# Supplementary material
Source: PubMed Central journal article supplement (PMC6012176)
Supplement: dey119suppl_figure1.pdf [file dey119suppl_figure1.pdf]

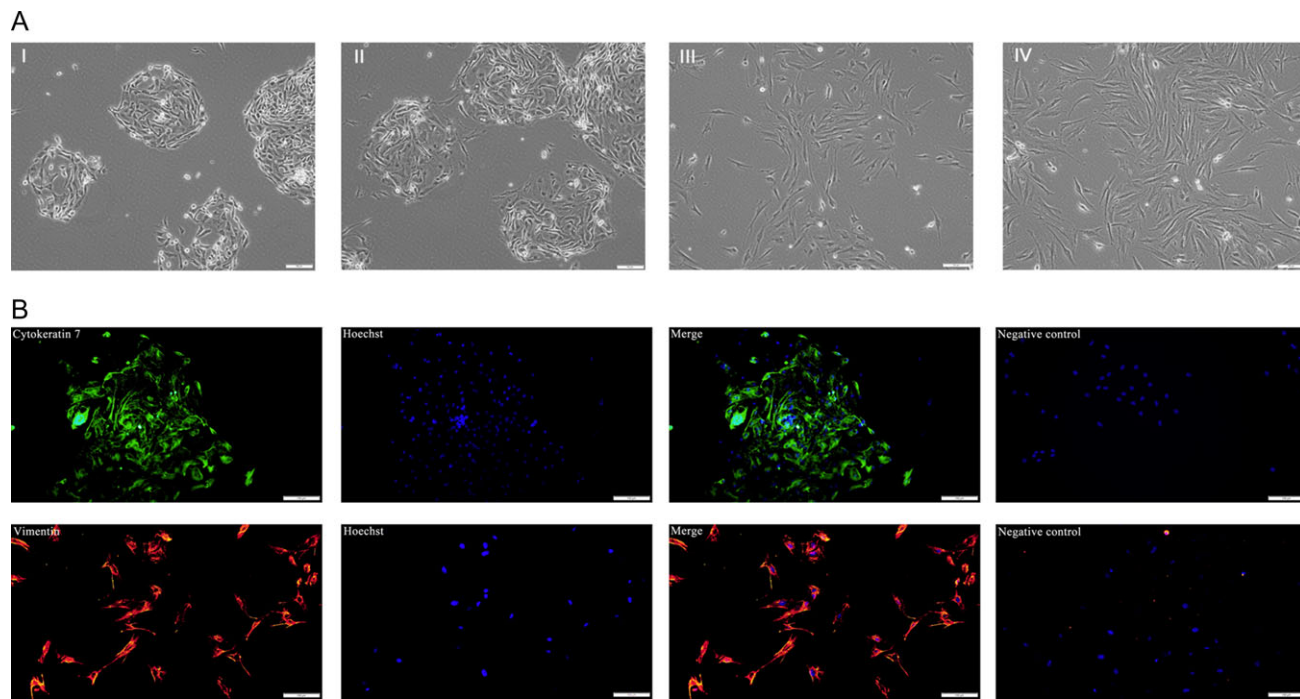

**Supplementary Figure S1** Validation of primary epithelial cells and stromal cells. **(A)** Morphology of primary epithelial cells (I and II) and stromal cells (III and IV) in an inverted brightfield microscope before transfection (I and III) and 24 h later after transfection (II and IV). **(B)** Immunofluorescence of epithelial cells and stromal cells stained with cytokeratin or vimentin antibodies under a fluorescence microscope.
