# Supplementary material
Source: PubMed Central journal article supplement (PMC6012176)
Supplement: dey119suppl_figure2.pdf [file dey119suppl_figure2.pdf]

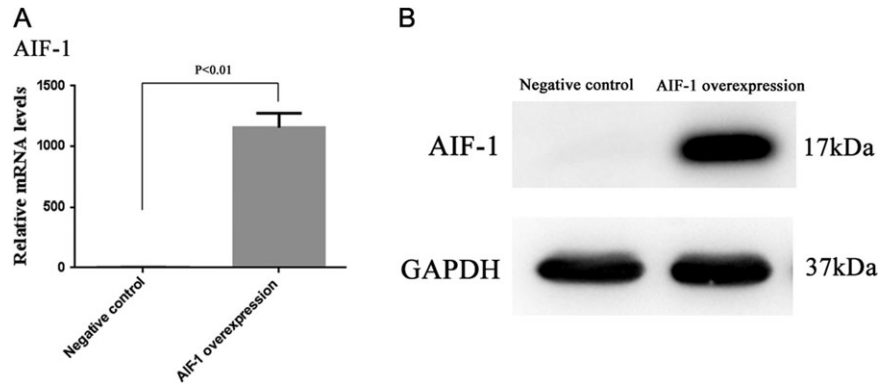

**Supplementary Figure S2** Expression of AIF-1 after lentivirus infection in Ishikawa cells. **(A)** mRNA levels of AIF-1 in negative and AIF-1 lentivirus infection groups using RT-qPCR. **(B)** Protein levels of AIF-1 in negative and AIF-1 lentivirus infection groups using Western blotting. All data are presented as mean  $\pm$  SEM. The differences between groups were analyzed by independent sample *t*-test. Data were considered statistically significant if  $P < 0.05$ .
