# Supplementary material
Source: PubMed Central journal article supplement (PMC6012176)
Supplement: dey119suppl_table1.pdf [file dey119suppl_table1.pdf]

**Supplementary Table S1 Demographic characteristics of women in two controlled ovarian stimulation protocol groups.**

|                                               | <b>GnRH agonist group (n = 123)</b> | <b>GnRH antagonist group (n = 115)</b> | <b>P</b> |
|-----------------------------------------------|-------------------------------------|----------------------------------------|----------|
| Age (years)                                   | 29.9 ± 3.2                          | 29.4 ± 3.3                             | 0.295    |
| BMI                                           | 21.9 ± 3.15                         | 22.1 ± 3.6                             | 0.629    |
| Number of canceled cycles                     | 31                                  | 34                                     |          |
| Number of transfer cycles                     | 92                                  | 81                                     |          |
| Basic FSH level (mIU/ml)                      | 7.5 ± 1.9                           | 7.4 ± 1.9                              | 0.800    |
| Basic LH level (mIU/ml)                       | 4.5 ± 2.8                           | 4.5 ± 2.4                              | 0.930    |
| Basic estradiol level (pg/ml)                 | 37.1 ± 18.0                         | 39.0 ± 17.5                            | 0.497    |
| Basic progesterone level (ng/ml)              | 0.6 ± 0.5                           | 0.5 ± 0.3                              | 0.208    |
| Stimulation duration (day)                    | 12.1 ± 2.0                          | 11.4 ± 2.3                             | 0.028    |
| Total gonadotrophin used (IU)                 | 2613 ± 891.4                        | 2398 ± 712.6                           | 0.084    |
| Total cetrotide used (mg)                     |                                     | 1.1 ± 0.4                              | 0.000    |
| Duration of cetrotide use (day)               |                                     | 4.5 ± 1.6                              | 0.000    |
| Estradiol level on hCG day (pg/ml)            | 4568 ± 1778.4                       | 4485 ± 1959.8                          | 0.772    |
| Progesterone level on hCG day (ng/ml)         | 1.0 ± 0.3                           | 1.1 ± 0.5                              | 0.156    |
| LH level on hCG day (mIU/ml)                  | 1.9 ± 2.4                           | 2.6 ± 2.4                              | 0.070    |
| Number of oocytes retrieved                   | 11.5 ± 3.5                          | 10.5 ± 3.8                             | 0.072    |
| Number of available embryos                   | 4.9 ± 2.8                           | 4.2 ± 2.7                              | 0.124    |
| Number of embryo transfer                     | 1.9 ± 0.3                           | 1.8 ± 0.4                              | 0.243    |
| Average score of embryo transfer              | 7.1 ± 1.3                           | 7.0 ± 1.1                              | 0.514    |
| Endometrial thickness on hCG day (cm)         | 1.1 ± 0.2                           | 1.0 ± 0.2                              | 0.074    |
| Implantation rate (per embryo transferred)    | 66/175 (37.7%)                      | 37/149 (24.8%)                         | 0.013    |
| Clinical pregnancy rate (per embryo transfer) | 47/92 (51%)                         | 26/81 (32%)                            | 0.012    |
| Pregnancy loss rate(per embryo transfer)      | 6/92 (7%)                           | 7/81 (9%)                              | 0.598    |
| Multiple pregnancy rate (per pregnancy)       | 11/47 (23%)                         | 3/27 (11%)                             | 0.233    |
| Severe OHSS rate (per embryo transfer)        | 4/92 (4%)                           | 0/81 (0%)                              | 0.124    |

Data presented as mean ± SD for quantitative variables and frequency for qualitative variables. The chisquare and Fisher's exact test were considered for quantitative variables and the Student t-test was considered for quantitative variables. Statistical significance was defined as  $P < 0.05$ .
