# Supplementary material
Source: PubMed Central journal article supplement (PMC6012176)
Supplement: dey119suppl_table2.pdf [file dey119suppl_table2.pdf]

**Supplementary Table SII** Demographic characteristics of the women used to compare three different phases during the menstrual cycle.

|                                  | Phase of menstrual cycle    |                            |                       | P     |
|----------------------------------|-----------------------------|----------------------------|-----------------------|-------|
|                                  | Early proliferative (n = 6) | Late proliferative (n = 6) | Mid-secretory (n = 6) |       |
| Age (years)                      | 31.5 ± 2.7                  | 30.8 ± 1.4                 | 30.2 ± 2.6            | 0.620 |
| BMI kg/m <sup>2</sup>            | 20.8 ± 1.8                  | 22.1 ± 2.2                 | 21.7 ± 2.0            | 0.514 |
| Basic FSH level (mIU/ml)         | 7.7 ± 1.6                   | 6.3 ± 2.4                  | 7.0 ± 1.4             | 0.451 |
| Basic LH level (mIU/ml)          | 4.2 ± 1.4                   | 3.8 ± 1.7                  | 3.2 ± 1.8             | 0.587 |
| Basic Estradiol level (pg/ml)    | 32.2 ± 8.5                  | 31.7 ± 15.7                | 38.2 ± 13.8           | 0.634 |
| Basic Progesterone level (ng/ml) | 0.9 ± 0.3                   | 0.9 ± 0.31                 | 0.9 ± 0.2             | 0.857 |

Data presented as mean ± SD. Data were analyzed by ANOVA. Statistical significance was defined as  $p < 0.05$ .
